# Supplementary material
Source: publisher figshare collection journal article supplement (https://tandf.figshare.com/articles/dataset/_/12296060)
Supplement: Supplementary file 1 [file 1]

## Supplementary material for

Oliveira & Granhag – *Ship hull in-water cleaning and its effects on fouling-control coatings*

# SENSITIVITY ANALYSIS FOR SURFACE FORCES UNDER AN IMMERSED VERTICAL JET

| Sources of error       | Range in input   | Rationale                                                                      |
|------------------------|------------------|--------------------------------------------------------------------------------|
| Flowrate, $Q$          | $\pm 0.15$ l/min | Accuracy of the rotameter (Kytola Instruments, Muurame, Finland)               |
| Standoff distance, $H$ | $\pm 1$ mm       | Reading error on distance scale for the gantry positioning system ( $z$ axis). |

**A. Uncertainties due to errors on input variables, for a standoff distance  $H = 25$  mm**

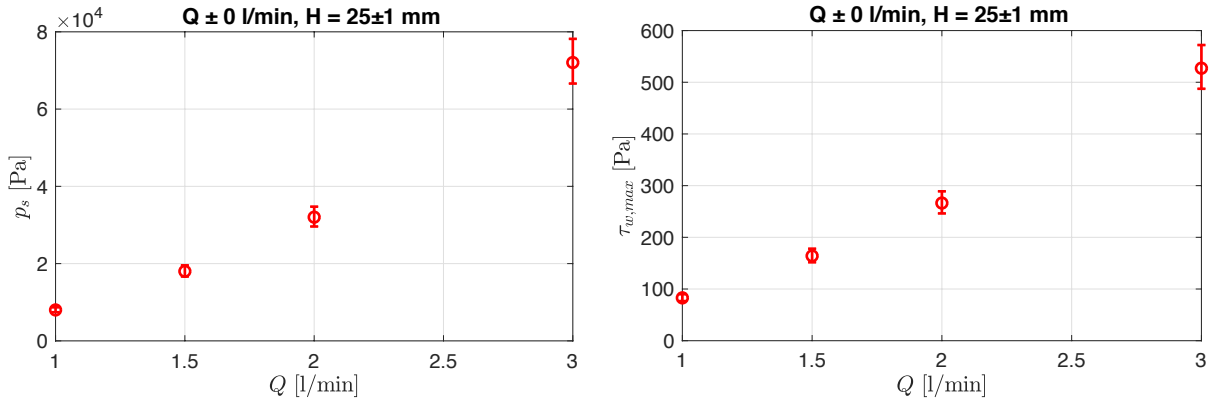

Fig. A1 – Stagnation pressure  $p_s$  (a) and maximum wall shear stress  $\tau_{w,max}$  (b) under an immersed vertically-impinging waterjet, calculated using Equations 1 and 2 (respectively), with **null error on flow rate  $Q$** , and  **$\pm 1$  mm error on standoff distance  $H = 25$  mm**.

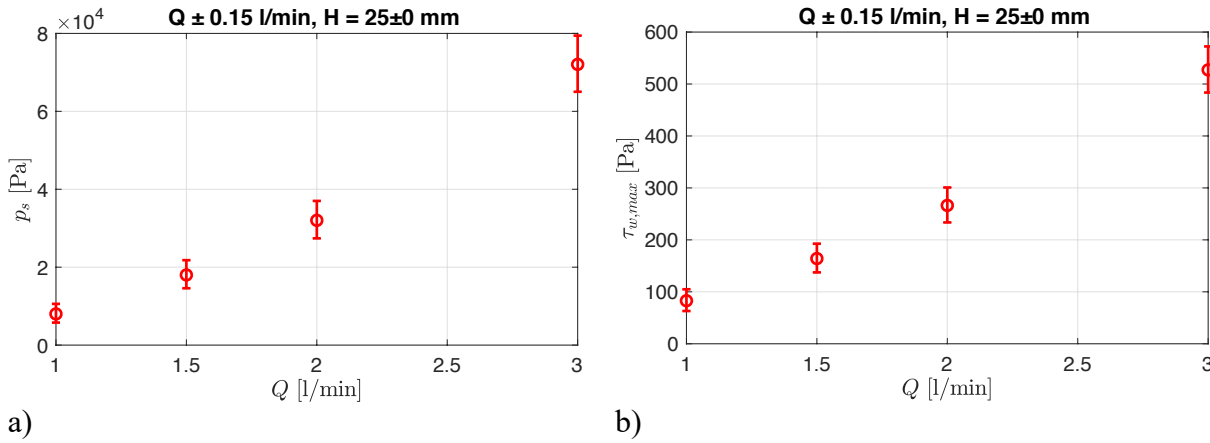

Fig. A2 – Stagnation pressure  $p_s$  (a) and maximum wall shear stress  $\tau_{w,max}$  (b) under an immersed vertically-impinging waterjet, calculated using Equations 1 and 2 (respectively), with  **$\pm 0.15$  l/min error on flow rate  $Q$** , and **null error on standoff distance  $H = 25$  mm**.

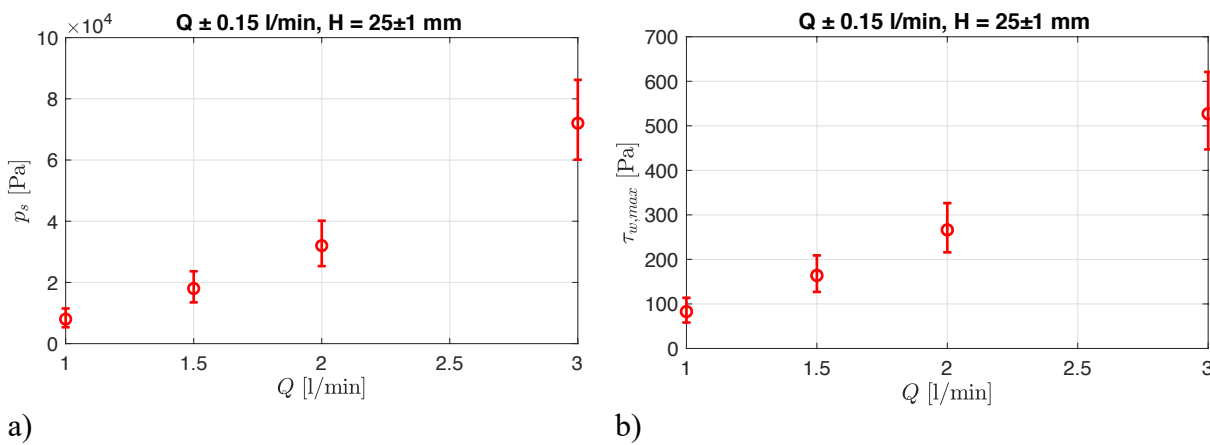

Fig. A3 – Stagnation pressure  $p_s$  (a) and maximum wall shear stress  $\tau_{w,max}$  (b) under an immersed vertically-impinging waterjet, calculated using Equations 1 and 2 (respectively), with  **$\pm 0.15$  l/min error on flow rate  $Q$** , and  **$\pm 1$  mm error on standoff distance  $H = 25$  mm**.

**B. Uncertainties due to errors on input variables, for a standoff distance  $H = 16$  mm**

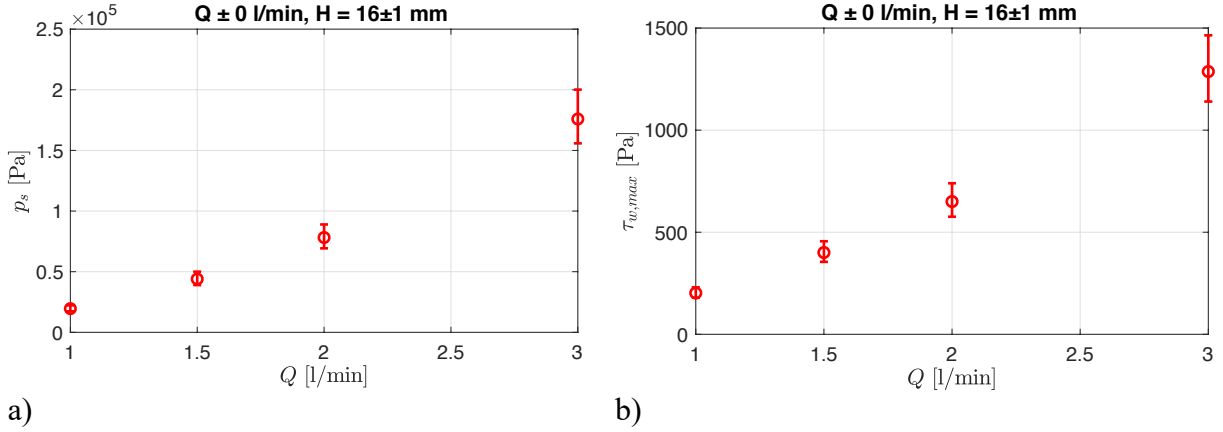

Fig. B1 – Stagnation pressure  $p_s$  (a) and maximum wall shear stress  $\tau_{w,max}$  (b) under an immersed vertically-impinging waterjet, calculated using Equations 1 and 2 (respectively), with **null error on flow rate  $Q$** , and  **$\pm 1$  mm error on standoff distance  $H = 16$  mm**.

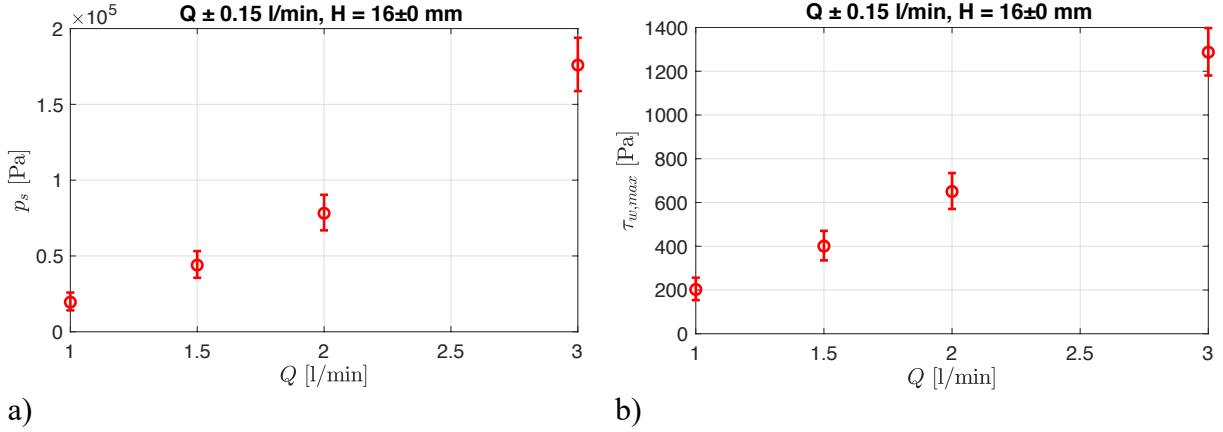

Fig. B2 – Stagnation pressure  $p_s$  (a) and maximum wall shear stress  $\tau_{w,max}$  (b) under an immersed vertically-impinging waterjet, calculated using Equations 1 and 2 (respectively), with  **$\pm 0.15$  l/min error on flow rate  $Q$** , and **null error on standoff distance  $H = 16$  mm**.

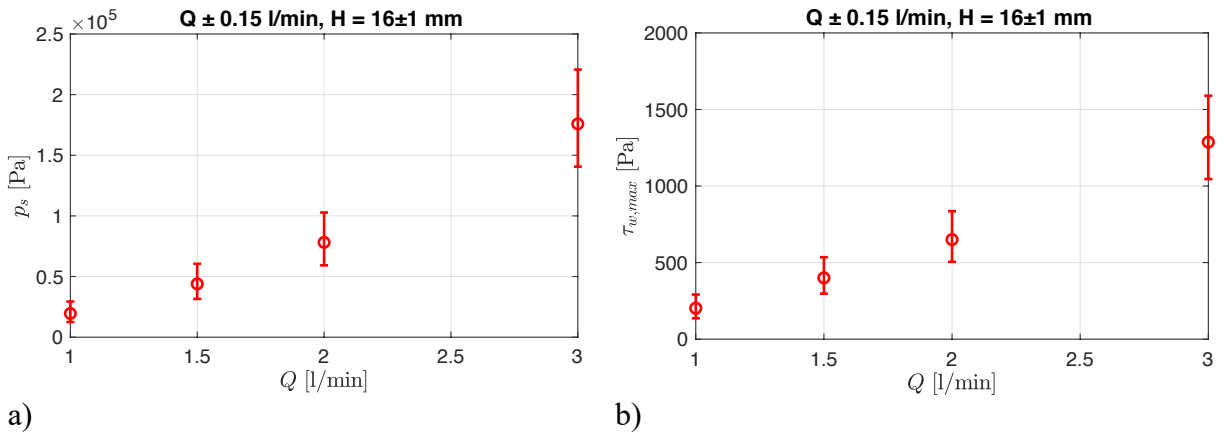

Fig. B3 – Stagnation pressure  $p_s$  (a) and maximum wall shear stress  $\tau_{w,max}$  (b) under an immersed vertically-impinging waterjet, calculated using Equations 1 and 2 (respectively), with  **$\pm 0.15$  l/min error on flow rate  $Q$** , and  **$\pm 1$  mm error on standoff distance  $H = 16$  mm**.
